# Supplementary material
Source: PubMed Central journal article supplement (PMC4801005)
Supplement: NIHMS735573-supplement.pdf [file NIHMS735573-supplement.pdf]

## Supplemental Material

### Supplementary figures and figure legends

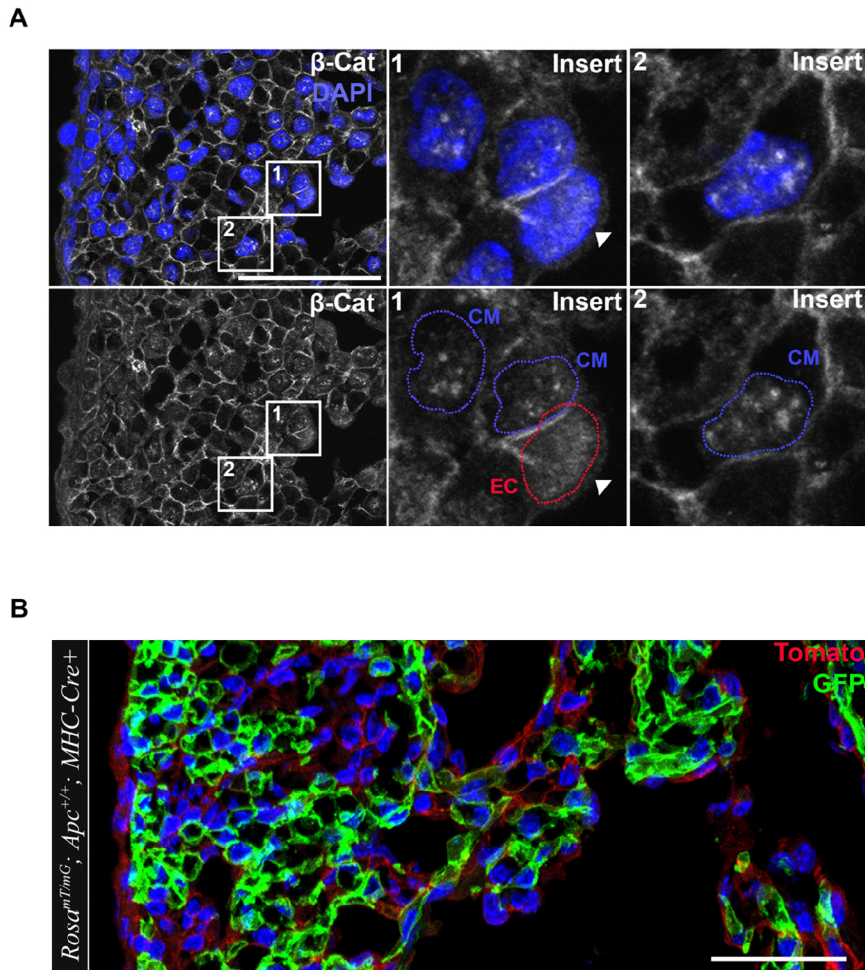

**Figure S1.** A, Nuclear  $\beta$ -catenin is clearly seen at high power magnification (100X) in CMs of WT mice at E13.5. In addition to weak diffuse nuclear staining, distinctive bright foci are present in areas lacking DAPI (euchromatin) in CMs. Endothelial cells (triangle) also contain nuclear  $\beta$ -catenin with pannuclear stain and no bright foci. B, Efficient  *$\alpha$ MHC-Cre*-mediated conversion of membrane-targeted red to green fluorescent proteins is observed in both compact and trabecular layers at E13.5. Scale bar=50  $\mu$ m.

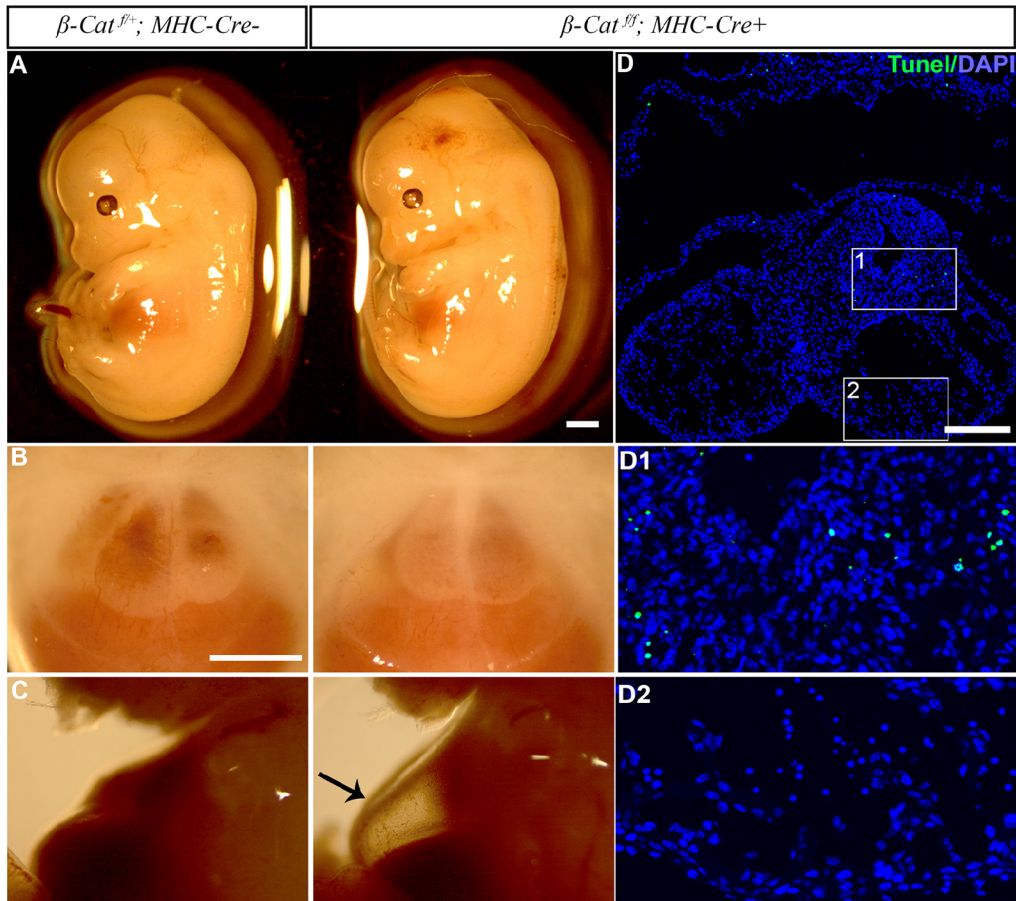

**Figure S2.** Gross morphology of E13.5 embryos shows that  $\beta\text{-Cat}$  cKO mice have similar body profiles to WT mice (A), but show smaller heart and bigger pericardial cavity than WT mice (B) indicating pericardial edema (C, arrow). Scale bar=1 mm. D, No apoptotic cells are observed in the ventricle wall (D2) of  $\beta\text{-Cat}$  cKO at E13.5 although both WT and KO mice have apoptotic cells in the valvular area (D1). Scale bar=200  $\mu\text{m}$ .

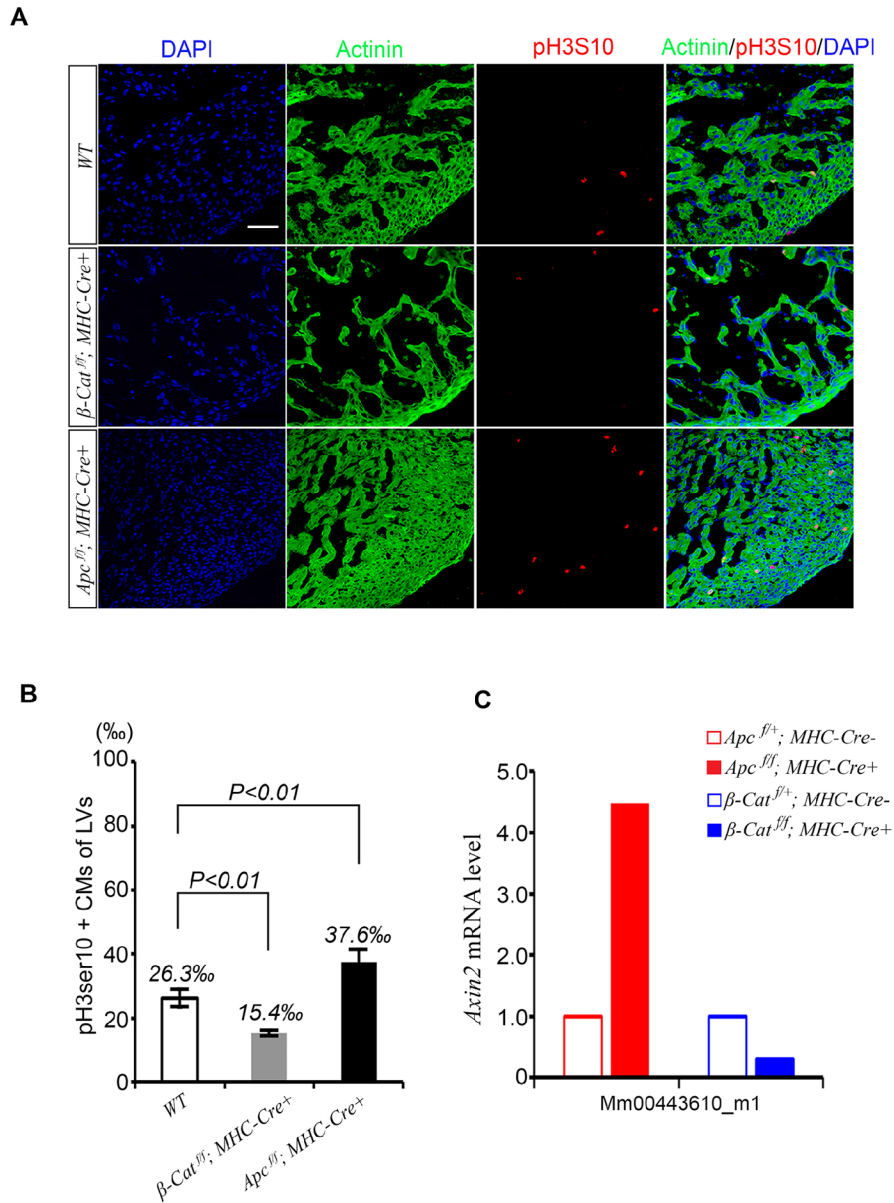

**Figure S3.** At E13.5, the intensity of sarcomeric  $\alpha$ -actinin did not show significant difference between compact and trabecular layers or among different genotypes. However, pH3S10 is decreased in  $\beta$ -Cat cKO and increased in *Apc* cKO mice (A and B). Data are presented as mean  $\pm$  SD. N=3-4 for each genotype. Scale bar=50  $\mu$ m. C, A bar graphs of Taqman real-time PCR in E13.5 *Apc* cKO and  $\beta$ -Cat cKO shows relative fold change of *Axin2* over WT. The Taqman probe for *Axin2* is listed below the bar.

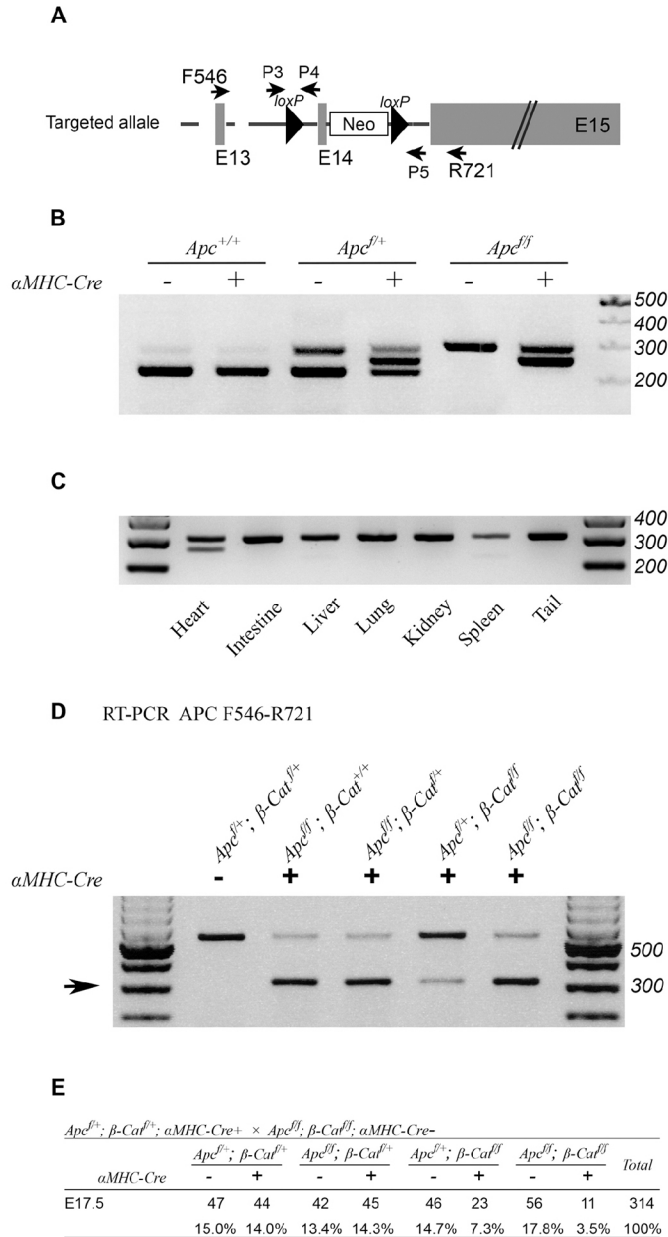

**Figure S4.** Cardiac-specific deletion of *Apc* at E17.5. A, Diagram shows the position of primers used for RT-PCR (F546 and R721) and genomic PCR (P3, P4 and P5). B, Targeted (314 bp) and WT (226 bp) alleles were detected in mice with or without *aMHC-Cre* while deleted allele (258 bp) was only amplified in hearts with *aMHC-Cre*. C, PCR of genomic DNA from different organs revealed that deleted allele was only seen in the heart, but not from other organs. D, Representative RT-PCR results demonstrated that hearts with *aMHC-Cre* contained exon 14 deleted transcript (313 bp, black arrow) as well as wild type transcript (528 bp) as non-cardiomyocytes should have intact exon 14. E, Genotype frequency of  $\beta$ -*Cat* and *Apc* compound cKO mice at E17.5.

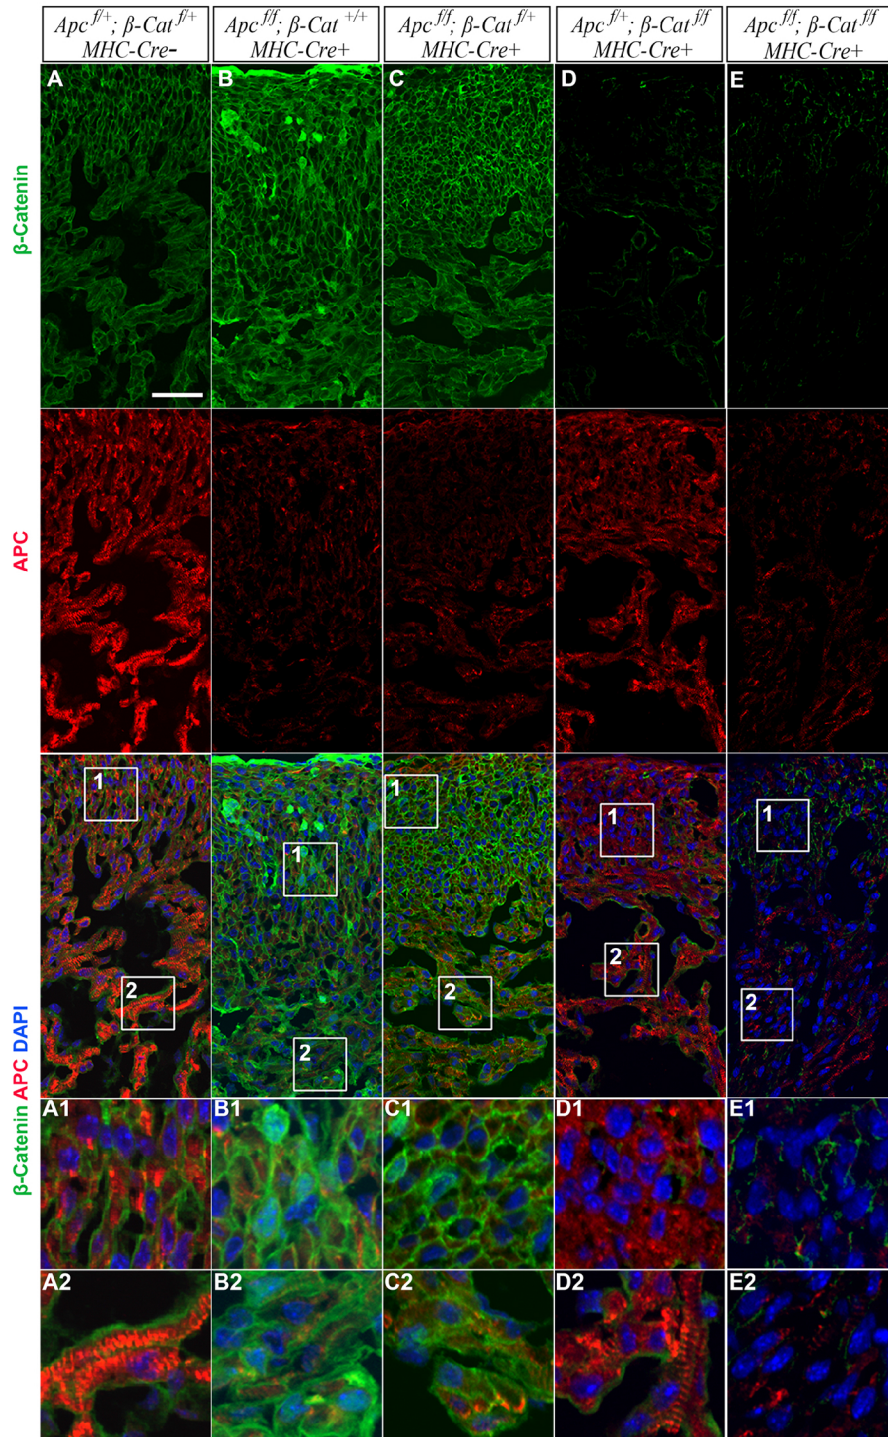

**Figure S5.** Representative confocal images of  $\beta$ -catenin and APC costained with DAPI in the left ventricle at E17.5 embryos. A-E, *Apc* deletion increases  $\beta$ -catenin expression in *β-Cat* WT hearts, which was partially attenuated by heterozygous *β-Cat* deletion. On the other hand, single or double *Apc* cKO could not prevent the loss of  $\beta$ -catenin in *β-Cat* cKO hearts at E17.5. Scale bar=50  $\mu$ m.

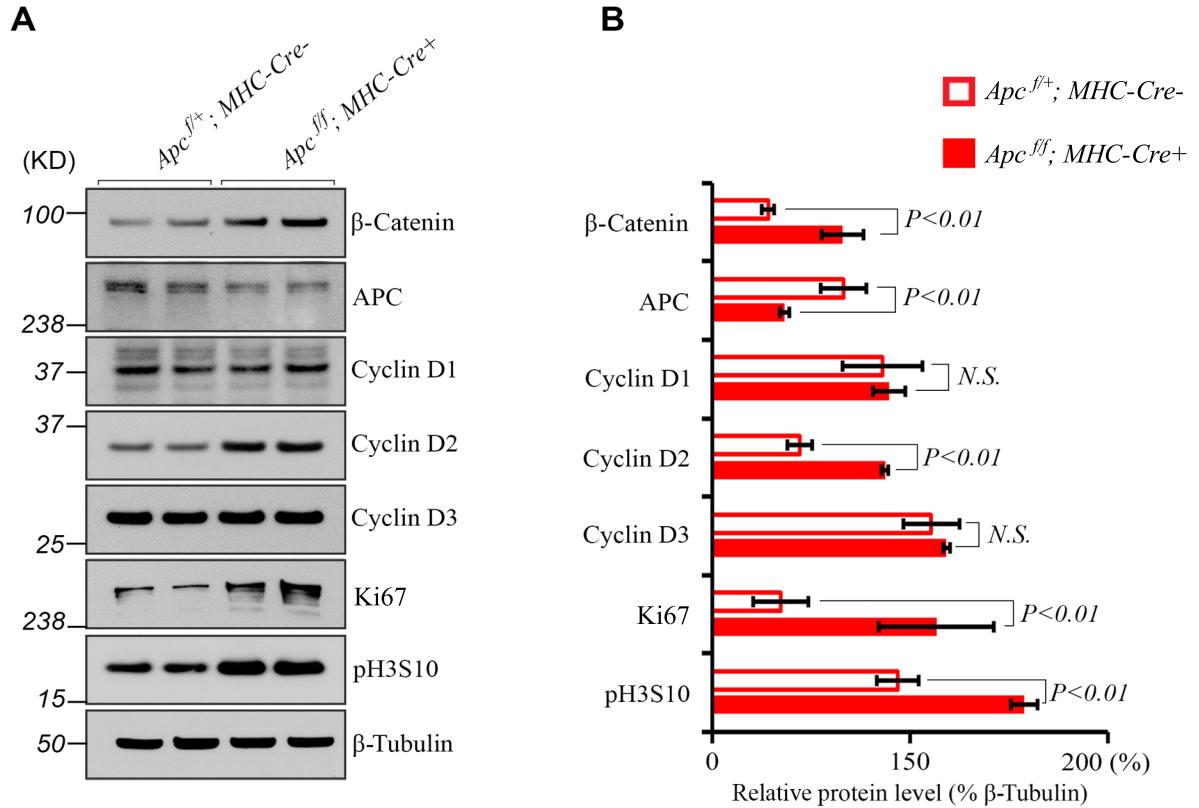

**Figure S6.** Representative Western blots (A) and Bar graphs (B) of relative densitometric values show protein levels of APC, β-Catenin, cyclin Ds, Ki67, and pH3S10 in *Apc* KO and WT hearts at E17.5. Cyclin D2, β-catenin, Ki67, and pH3S10 are increased while APC is downregulated upon cardiac *Apc* deletion at E17.5. Band intensities are quantified by ImageJ and normalized to β-tubulin. Data are presented as mean ± SD. N=3-4 for each genotype.

## Supplementary tables

**Table S1.** Genotyping results of embryos from timed pregnancy between  $\beta\text{-Cat}^{ff}$ ;  $\alpha\text{MHC-Cre}^-$  and  $\beta\text{-Cat}^{ff+}$ ;  $\alpha\text{MHC-Cre}^+$  mice.

| Age   | $\beta\text{-Cat}^{ff+}$ |                          | $\beta\text{-Cat}^{ff}$  |                          | Total |
|-------|--------------------------|--------------------------|--------------------------|--------------------------|-------|
|       | $\alpha\text{MHC-Cre}^-$ | $\alpha\text{MHC-Cre}^+$ | $\alpha\text{MHC-Cre}^-$ | $\alpha\text{MHC-Cre}^+$ |       |
| E13.5 | 16(24.2%)                | 18(27.3%)                | 14(21.2%)                | 18(27.3)*                | 66    |
| E14.5 | 13(25.5%)                | 13(25.5%)                | 15(25.5%)                | 10(19.6%)*               | 51    |
| E15.5 | 21(45.7%)                | 11(23.9%)                | 12(26.1%)                | 2(4.3%)*                 | 46    |

\*2 of 18 were dead at E13.5, 7 of 10 were dead at E14.5, 1 of 2 was dead at E15.5.

**Table S2.** Genotyping results of embryos from timed pregnancy between *Apc<sup>fl/fl</sup>*; *αMHC-Cre<sup>-</sup>* and *Apc<sup>fl/+</sup>*; *αMHC-Cre<sup>+</sup>* mice.

| Age   | <i>Apc<sup>fl/+</sup></i>   |                             | <i>Apc<sup>fl/fl</sup></i>  |                             | Total |
|-------|-----------------------------|-----------------------------|-----------------------------|-----------------------------|-------|
|       | <i>αMHC-Cre<sup>-</sup></i> | <i>αMHC-Cre<sup>+</sup></i> | <i>αMHC-Cre<sup>-</sup></i> | <i>αMHC-Cre<sup>+</sup></i> |       |
| E13.5 | 19(27.5%)                   | 23(33.3%)                   | 12(17.4%)                   | 15(21.7)                    | 51    |
| E15.5 | 22(25.6%)                   | 21(24.4%)                   | 25(29.1%)                   | 18(21.0%)                   | 86    |
| E17.5 | 38(26.6%)                   | 36(25.2%)                   | 33(23.1%)                   | 36(25.2%)                   | 143   |



**Table S3.** Primer pairs for real time RT-PCR

| Targets          | Primer pairs             |                           |
|------------------|--------------------------|---------------------------|
|                  | Forward Primer           | Reverse Primer            |
| <i>β-catenin</i> | TCAAGAGAGCAAGCTCATCATTCT | CACCTTCAGCACTCTGCTTGTG    |
| <i>Apc</i>       | AACCTGTCTGCACACTGCAC     | CAAGCTGGACACATTCCGTA      |
| <i>CyclinD1</i>  | GCGTACCCTGACACCAATCTC    | CTCCTCTTCGCACTTCTGCTC     |
| <i>CyclinD2</i>  | GAGTGGGAACTGGTAGTGTTG    | CGCACAGAGCGATGAAGG T      |
| <i>CyclinD3</i>  | TGCGTGCAAAGGAGATCAAG     | GGACAGGTAGCGATCCAGGT      |
| <i>GSK3β</i>     | ATGGCAGCAAGGTAACCACAG    | TCTCGGTTCTTAAATCGCTTGTG   |
| <i>Myc</i>       | TAACTCGAGGAGGAGCTGGA     | GCCAAGGTTGTGAGGTTAGG      |
| <i>Gata4</i>     | CCACGGGCCCTCCATCCAT      | GGCCCCACGTCCCAAGTC        |
| <i>Hand1</i>     | GGTCGGCAGGTCTTCGTGTC     | GTGCGGCGGGTGTGAGTGG       |
| <i>Hand2</i>     | CCCGCCGACACCAAACCTCTC    | CCCCCGGCTCACTGCTCTC       |
| <i>Myh6</i>      | ACGGTGACCATAAAGGAGGA     | TGCCTCGATCTTGTGCAAC       |
| <i>Myh7</i>      | GCCCTTTGACCTCAAGAAAG     | CTTACAGTCACCGTCTTGC       |
| <i>Myl2</i>      | ACTTCACCGTGTTCTCACGATGT  | TCCGTGGGTAATGATGTGGACCAA  |
| <i>Myl7</i>      | AAGGGAAGGGTCCCATCAACTTCA | AACAGTTGCTCTACCTCAGCAGGA  |
| <i>Nppa</i>      | ACCCTGGGCTTCTTCTCGTCTT   | GCGGCCCTGCTTCTCA          |
| <i>Nkx2.5</i>    | CTCCGATCCATCCCACCTTA     | AGTGTGGAATCCGTCGAAAG      |
| <i>Pdgfra</i>    | CTGGTGCCGCTCCTATGAC      | CACGATCGTTTCTCCTGCCTTAT   |
| <i>SMA</i>       | ATCAGCAAACAGGAATACGACGAA | AGGAATGATTTGGAAAGGAACTGG  |
| <i>Tbx2</i>      | GAACGGCCGTCGGGAGAAAAG    | TGGGGGAGGGCGGTGGTT        |
| <i>Tbx3</i>      | ACCGGCATCCCTTTCTCATCC    | CCTTACCGGCCACCATCCAC      |
| <i>Tbx5</i>      | CTACCCCGCGCCCACTCTCAT    | TGCGGTCGGGGTCCAACACT      |
| <i>Tbx18</i>     | GGCGGCCGCTTCTGCTTCC      | TGCCTCCCGAGATCTGTCCCCTTCC |
| <i>Tbx20</i>     | ATCGCCGCTTATGTCCAG       | CCCCGCCGCAAACCTCC         |

**Table S4.** Mean relative value of genes in *Apc* KO and  $\beta$ -*catenin* KO hearts over WT controls by real time RT-PCR at E13.5.

| Target                            | Mean relative value of <i>Apc</i> KO/WT | Std. Deviation | <i>P</i> Sig. (2-tailed) | Mean relative value of $\beta$ - <i>Cat</i> KO/WT | Std. Deviation | <i>P</i> Sig. (2-tailed) |
|-----------------------------------|-----------------------------------------|----------------|--------------------------|---------------------------------------------------|----------------|--------------------------|
| <i><math>\beta</math>-catenin</i> | 1.4961                                  | 0.1729         | 0.0382                   | 0.6848                                            | 0.0821         | 0.0027                   |
| <i>Apc</i>                        | 0.7646                                  | 0.0909         | 0.0109                   | 1.0639                                            | 0.0878         | 0.3349                   |
| <i>CyclinD1</i>                   | 1.1438                                  | 0.3086         | 0.5043                   | 0.9781                                            | 0.0405         | 0.4475                   |
| <i>CyclinD2</i>                   | 2.1947                                  | 0.1602         | 0.0007                   | 0.9084                                            | 0.0926         | 0.1421                   |
| <i>CyclinD3</i>                   | 1.1860                                  | 0.0959         | 0.0784                   | 0.9506                                            | 0.0239         | 0.0699                   |
| <i>GSK3<math>\beta</math></i>     | 1.1930                                  | 0.0492         | 0.0210                   | 1.0441                                            | 0.0825         | 0.4074                   |
| <i>Myc</i>                        | 1.9395                                  | 0.0968         | 0.0001                   | 0.9232                                            | 0.0780         | 0.2300                   |
| <i>Gata4</i>                      | 1.1335                                  | 0.0901         | 0.0622                   | 1.1907                                            | 0.0824         | 0.0160                   |
| <i>Hand1</i>                      | 1.3252                                  | 0.0924         | 0.0259                   | 1.2110                                            | 0.0845         | 0.0124                   |
| <i>Hand2</i>                      | 1.3918                                  | 0.0891         | 0.0168                   | 1.0639                                            | 0.0501         | 0.1575                   |
| <i>Myh6</i>                       | 0.8885                                  | 0.0106         | 0.0030                   | 1.0330                                            | 0.0419         | 0.2442                   |
| <i>Myh7</i>                       | 1.3104                                  | 0.1177         | 0.0103                   | 0.6903                                            | 0.0541         | 0.0006                   |
| <i>Myl2</i>                       | 1.3894                                  | 0.2383         | 0.1054                   | 1.9331                                            | 0.1912         | 0.0011                   |
| <i>Myl7</i>                       | 1.6653                                  | 0.2285         | 0.0073                   | 0.8287                                            | 0.1389         | 0.1662                   |
| <i>Nppa</i>                       | 1.4189                                  | 0.0373         | 0.0026                   | 1.5322                                            | 0.0761         | 0.0003                   |
| <i>Nkx2.5</i>                     | 1.0523                                  | 0.0748         | 0.3494                   | 1.1057                                            | 0.0375         | 0.0082                   |
| <i>Pdgfra</i>                     | 1.3087                                  | 0.3594         | 0.2111                   | 0.6182                                            | 0.0483         | 0.0053                   |
| <i>SMA</i>                        | 1.2859                                  | 0.1165         | 0.0131                   | 1.1161                                            | 0.1091         | 0.1392                   |
| <i>Tbx2</i>                       | 0.7964                                  | 0.0520         | 0.0025                   | 1.0988                                            | 0.0476         | 0.0228                   |
| <i>Tbx3</i>                       | 1.1396                                  | 0.0460         | 0.0343                   | 1.0721                                            | 0.0311         | 0.0569                   |
| <i>Tbx5</i>                       | 1.2459                                  | 0.0402         | 0.0088                   | 1.2594                                            | 0.0051         | 0.0000                   |
| <i>Tbx18</i>                      | 0.7301                                  | 0.0430         | 0.0084                   | 0.9608                                            | 0.0582         | 0.3082                   |
| <i>Tbx20</i>                      | 1.2199                                  | 0.1036         | 0.0667                   | 0.8450                                            | 0.0210         | 0.0061                   |

**Table S5.** List of primary antibodies

| <b>Antibodies</b>            | <b>Company</b> | <b>Catalog No.</b> | <b>Dilution for IHC and IF</b> |
|------------------------------|----------------|--------------------|--------------------------------|
| Sarcomeric $\alpha$ -Actinin | Sigma          | A7811              | 1:400                          |
| $\beta$ -Catenin             | Cell signaling | 9582               | 1:200                          |
| $\beta$ -Catenin             | BD             | 610156             | 1:300                          |
| $\beta$ -Catenin             | Santa Cruz     | SC-7963            | 1:100                          |
| APC                          | Santa Cruz     | SC-895             | 1:100                          |
| Cyclin D1                    | Santa Cruz     | SC-718             | 1:200                          |
| Cyclin D2                    | Cell Signaling | 3741               | 1:100                          |
| Cyclin D3                    | Cell signaling | 2936               | 1:300                          |
| Ki67                         | Abcam          | ab16667            | 1:500                          |
| pH3S10                       | Millipore      | 06-570             | 1:600                          |
